# Supplementary material
Source: PubMed Central journal article supplement (PMC3659993)
Supplement: supp_2012.069393_2012_069393-Contributions.pdf [file supp_2012.069393_2012_069393-Contributions.pdf]

**Manuscript no. HAEMATOL/2012/069393 entitled “Brentuximab vedotin in refractory CD30+ lymphomas: a bridge to allogeneic transplantation in approximately one quarter of patients treated on a Named Patient Programme at a single UK Centre”**

**Authors: Adam Gibb, Craig Jones, Adrian Bloor, Samar Kulkarni, Tim Illidge, Kim Linton, and John Radford**

**Information about the contributions of each person named as having participated in the study**

**1) Guarantor(s), i.e., person(s) who is (are) responsible for the integrity of the work as a whole:**

- Professor John Radford, University of Manchester and The Christie NHS Foundation Trust, Manchester, [john.radford@manchester.ac.uk](mailto:john.radford@manchester.ac.uk)

According to the International Committee of Medical Journal Editors (ICMJE) ([http://www.icmje.org/ethical\\_1author.html](http://www.icmje.org/ethical_1author.html)): “Authorship credit should be based on: 1) substantial contributions to conception and design, acquisition of data, or analysis and interpretation of data; 2) drafting the article or revising it critically for important intellectual content; and 3) final approval of the version to be published. Authors should meet conditions 1, 2, and 3 ..... Acquisition of funding, collection of data, or general supervision of the research group alone does not constitute authorship”.

**The guarantors of this manuscript confirm that all persons designated as authors qualify for authorship, and that each author has participated sufficiently in the work to take public responsibility for appropriate portions of the content.**

**2) Authors who participated in the conception of the study: John Radford, Adam Gibb**

**3) Design & Methods. The following authors were responsible for specific investigations:**

- John Radford, Kim Linton, Tim Illidge, Craig Jones and Adam Gibb saw all the patients treated with brentuximab vedotin and collected the data
- Samar Kulkarni and Adrian Bloor reviewed all the patients before allogeneic transplant and undertook these procedures

**4) Results. The following authors were responsible for specific portions of the results, including figures and tables:**

- Adam Gibb, John Radford, Kim Linton, Tim Illidge, Craig Jones, Adrian Bloor and Samar Kulkarni were responsible for collecting the results and analysing these
- Figure 1 and Tables 1 and 2 were constructed by Adam Gibb and John Radford and reviewed/approved by all the other authors

**5) Writing the manuscript. The following authors were responsible for writing the manuscript:**

- Adam Gibb and John Radford wrote the first draft and this was reviewed/amended by Craig Jones, Adrian Bloor, Samar Kulkarni, Tim Illidge and Kim Linton
- All the authors then reviewed and approved the final submitted version

**6) Contributors Listed in Acknowledgments:**

- No additional contributors
- None of the authors received any assistance in connection with study design, data collection, data analysis or manuscript preparation
